# Supplementary material for: Synthesis and characterization of arylamino end-capped silafluorenes for blue to deep-blue organic light-emitting diodes (OLEDs)
Source: Royal Society of Chemistry journal article supplement (doi:10.1039/c5tc00382b), 2015-01-01
Supplement: c5tc00382b1.pdf [file c5tc00382b1.pdf]

# Synthesis and characterization of arylamino end-capped silafluorenes for blue to deep-blue organic light-emitting diodes (OLEDs) †

Shao Fu Chen<sup>a</sup>, Yuan Tian<sup>b</sup>, Jinghong Peng<sup>b</sup>, Huarong Zhang<sup>a</sup>, Xin Jiang Feng<sup>\*a</sup>, Haixia Zhang<sup>a</sup>, Xinjun Xu<sup>\*b</sup>, Lidong Li<sup>b</sup>, Jianhua Gao<sup>a</sup>

5 Received (in XXX, XXX) Xth XXXXXXXXXX 20XX, Accepted Xth XXXXXXXXXX 20XX

DOI: 10.1039/b000000x

## Contents

### Synthesis and characterization of compounds with details

Fig. S1 Cyclic voltammograms of oxidation waves of TDMS, TPMS, CDMS, and CPMS

10 Table S1 Summary of EL device performance of silafluorene derivatives based on device B

Fig. S2 Current-voltage-brightness, luminance-current density, external quantum efficiency-current density, and power efficiency-current density curves of device B with TDMS, TDPS, and DPFL-NPB

Table S2 Summary of EL device performance of silafluorene derivatives based on device D

Fig. S3 EL spectra of device D with TDMS, TDPS, or DPFL-NPB as dopants

15 Fig. S4 Current-voltage-brightness, luminance-current density, external quantum efficiency-current density, and power efficiency-current density curves of device D with TDMS, TDPS, and DPFL-NPB

## Synthesis

20 **Compound 2** To a 500 ml round flask was added 2,5-dibromonitrobenzene (50.0g, 178mmol), copper powder (27.0g, 424mmol) and DMF (200ml). The resulting mixture was heated to 125°C and stirred for 3h. The reaction mixture was cooled to room temperature and filtered. The filtrate was evaporated and the residue was recrystallized in methanol to give compound 2 (28.1g, 78%). <sup>1</sup>H NMR (400 MHz, CDCl<sub>3</sub>) δ: 8.38 (d, *J* = 1.8 Hz, 2H), 7.83 (dd, *J* = 8.2, 1.9 Hz, 2H), 7.17 (t, *J* = 9.3 Hz, 2H). MS (MALDI-TOF): *m/z*: 399.7.

25 **Compound 3** To a three-necked round flask was added compound 2 (20g, 49.8mmol), 32% aq. hydrochloride (161.2ml) and ethanol (250ml) in sequence and then tin powder (22.88, 192.7 mmol) was added in 10 mins. The reaction mixture was heated to reflux and stirred for 2h. The reaction mixture was poured into ice-water (520 ml) slowly and neutralized with 20%NaOH (195ml). The mixture was extracted with ether and the organic phase was washed with brine, dried with anhydrous sodium sulfate and evaporated. The residue was purified by column chromatography to give compound 3 as light yellow solid (14.8g, 88%). <sup>1</sup>H NMR (400 MHz, CDCl<sub>3</sub>) δ 6.93 (d, *J* = 1.2 Hz, 6H), 3.77 (s, 4H). MS (MALDI-TOF): *m/z*: 339.9.

30 **Compound 4** Compound 3 (20 g, 58.5 mmol) was added over 1 h into a stirring mixture of 40 % w/w nitrosylsulfuric acid in sulfuric acid (24 ml) and concentrated sulfuric acid (98%, 24 ml) at 0 °C. The resulting mixture was stirred for a further 3 hours to give a deep orange viscous solution. This mixture was then added dropwise over 1 h into an aqueous solution of potassium iodide (290 g in 300 ml H<sub>2</sub>O) at -10 °C and the reaction was stirred overnight at room temperature. The reaction was quenched with NaOH solution until pH = 7. The product was then extracted into diethyl ether and the organic layer washed with brine, dried with anhydrous MgSO<sub>4</sub> and evaporated. The residue was purified by column chromatography (petroleum ether) to yield compound 4 as an off-white solid (6.7 g, 20.3%). <sup>1</sup>H NMR (400 MHz, CDCl<sub>3</sub>) δ: 8.09 (d, *J* = 1.9 Hz, 2H), 7.56 (dd, *J* = 8.2, 1.9 Hz, 2H), 7.03 (d, *J* = 8.2 Hz, 2H). MS (MALDI-TOF): *m/z*: 561.7.

35 **Compound 5** To a solution of compound 4 (1.5g, 2.66mmol) in dry diethyl ether (30 ml) was added *t*-BuLi (6.65ml, 10.64mmol, 1.6mol/L in toluene) dropwise over 45 min at -78 °C under N<sub>2</sub>. The resultant mixture was stirred 1 h at -78 °C and then (CH<sub>3</sub>)<sub>2</sub>SiCl<sub>2</sub> (0.64ml, 5.32mmol) was added. The reaction was then allowed to warm to room temperature and stirred overnight. The reaction was quenched with water, extracted with diethyl ether, washed with brine, dried over dry sodium sulfate, and evaporated. The residue was columned to give a white solid (0.68g, 69.5%). <sup>1</sup>H NMR (400 MHz, CDCl<sub>3</sub>) δ: 7.71 (s, 2H), 7.63 (d, *J* = 8.3, 1.5 Hz, 2H), 7.54 (dd, *J* = 8.3, 1.9 Hz, 2H), 0.43 (s, 6H). MS (MALDI-TOF): *m/z*: 367.8.

40 **Compound 6** To a solution of compound 4 (1.5g, 2.66mmol) in dry diethyl ether (30 ml) was added *t*-BuLi (6.65ml, 10.64mmol, 1.6mol/L in toluene) dropwise over 45 min at -78 °C under N<sub>2</sub>. The resultant mixture stirred 1 h at -78 °C and then Ph<sub>2</sub>SiCl<sub>2</sub> (1.13ml, 5.32mmol) was added. The reaction was then allowed to warm to room temperature and stirred overnight. The reaction was quenched with water, extracted with diethyl ether, washed with brine, dried over dry sodium sulfate, and evaporated. The residue was columned to give a white solid (1.05g, 76.0%). <sup>1</sup>H NMR (400 MHz, CDCl<sub>3</sub>) δ: 7.83 (s, 2H), 7.70 (d, *J* = 8.3 Hz, 2H), 7.66–7.54 (m, 6H), 7.45 (d, *J* = 6.2Hz, 2H), 7.38 (t, *J* = 7.4Hz, 4H). MS (MALDI-TOF): *m/z*: 492.0.

45 **TDMS** To a 100 ml Shreck flask was added compound 5 (200mg, 0.54mmol), compound 7 (468mg, 1.62mmol), Pd(OAc)<sub>2</sub> (6mg, 0.027mmol), P(*o*-tolyl)<sub>3</sub> (16mg, 0.054mmol), toluene (16ml), methanol (8ml), and 2 M K<sub>2</sub>CO<sub>3</sub> solution (0.8ml). The reaction mixture was degassed with argon 3 times, heated to 75 °C, and stirred overnight under Ar. The reaction was cooled to room temperature, extracted with dichloromethane, washed with brine, dried over dry sodium sulfate, and evaporated. The residue was purified by column chromatography

with petroleum ether/dichloromethane = 10:1 to give a light green solid which was recrystallized with dichloromethane and methanol to yield **TDMS** (260mg, 69%) as gray solid. <sup>1</sup>H NMR (400 MHz, CDCl<sub>3</sub>) δ: 7.90 – 7.82 (m, 4H), 7.65 (d, *J* = 8.0 Hz, 2H), 7.54 (d, *J* = 8.6 Hz, 4H), 7.29 (d, *J* = 8.1 Hz, 7H), 7.15 (t, *J* = 6.4 Hz, 11H), 7.04 (t, *J* = 7.3 Hz, 4H), 0.48 (s, 6H). <sup>13</sup>C NMR (100 MHz, CDCl<sub>3</sub>) δ: 147.72, 147.14, 146.33, 139.71, 139.47, 135.21, 131.01, 129.31, 128.71, 127.70, 124.40, 124.07, 122.93, 121.21. MS (MALDI-TOF): *m/z*: 696.2.

5 Anal. calcd. for C<sub>50</sub>H<sub>40</sub>N<sub>2</sub>Si: C, 86.17; H, 5.78; N, 4.02; Si, 4.03. Found: C, 86.06; H, 5.85; N, 4.13; Si, 4.11.

**CDMS** Using the method for **TDMS**, **CDMS** was prepared as light yellow solid (128mg, 34.3%), with compound **5** (200mg, 0.54mmol), compound **8** (465mg, 1.62mmol), Pd(OAc)<sub>2</sub> (6mg, 0.027mmol), P(*o*-tolyl)<sub>3</sub> (16mg, 0.054mmol), toluene (16ml), methanol (8ml), and 2 M K<sub>2</sub>CO<sub>3</sub> solution (0.8ml). <sup>1</sup>H NMR (400 MHz, CDCl<sub>3</sub>) δ: 8.18 (d, *J* = 7.8 Hz, 4H), 8.02 (d, *J* = 8.4 Hz, 4H), 7.92 (d, *J* = 8.3 Hz, 4H), 7.82 (d, *J* = 6.8 Hz, 2H), 7.68 (d, *J* = 8.3 Hz, 4H), 7.51 (d, *J* = 8.2 Hz, 4H), 7.45 (t, *J* = 7.6 Hz, 4H), 7.32 (t, *J* = 7.4 Hz, 4H), 0.57 (s, 6H). <sup>13</sup>C NMR (100 MHz, CDCl<sub>3</sub>) δ 146.92, 140.91, 140.29, 140.12, 139.31, 136.87, 131.5, 129.26, 128.42, 127.39, 125.98, 123.46, 121.52, 120.35, 120.00, 109.85. MS (MALDI-TOF): *m/z*: 692.3. Anal. calcd. for C<sub>60</sub>H<sub>44</sub>N<sub>2</sub>Si: C, 87.77; H, 5.40; N, 3.41; Si, 3.42. Found: C, 87.52; H, 5.54; N, 3.44; Si, 3.40.

**TDPS** Using the method for **TDMS**, **TDPS** was prepared as light green solid (230mg, 68%), with compound **6** (200mg, 0.41mmol), compound **7** (352mg, 1.22mmol), Pd(OAc)<sub>2</sub> (4.6mg, 0.021mmol), P(*o*-tolyl)<sub>3</sub> (12mg, 0.039mmol), toluene (18ml), methanol (9ml), and 2 M K<sub>2</sub>CO<sub>3</sub> solution (1 ml). <sup>1</sup>H NMR (400 MHz, CDCl<sub>3</sub>) δ: 8.00 – 7.91 (m, 4H), 7.71 (d, *J* = 6.4 Hz, 6H), 7.53 (d, *J* = 8.5 Hz, 4H), 7.41 (d, *J* = 7.0 Hz, 2H), 7.36 (t, *J* = 7.1 Hz, 4H), 7.27 (dd, *J* = 8.7, 6.7 Hz, 6H), 7.14 (d, *J* = 8.1 Hz, 12H), 7.03 (t, *J* = 7.2 Hz, 4H). <sup>13</sup>C NMR (100 MHz, CDCl<sub>3</sub>) δ: 147.54, 147.21, 139.78, 136.67, 135.54, 134.85, 132.54, 132.08, 129.99, 129.50, 128.76, 128.1, 127.71, 124.42, 123.83, 122.76, 121.41. MS (MALDI-TOF): *m/z*: 820.3. Anal. calcd. for Chemical Formula: C<sub>50</sub>H<sub>36</sub>N<sub>2</sub>Si: C, 86.67; H, 5.24; N, 4.04; Si, 4.05. Found: C, 86.45; H, 5.43; N, 4.15; Si, 4.17.

**CDPS** Using the method for **TDMS**, **CDPS** was prepared as light yellow solid (152 mg, 46%), with compound **6** (200mg, 0.41mmol), compound **8** (350mg, 1.22mmol), Pd(OAc)<sub>2</sub> (4.6mg, 0.021mmol), P(*o*-tolyl)<sub>3</sub> (12mg, 0.039mmol), toluene (18ml), methanol (9ml), and 2 M K<sub>2</sub>CO<sub>3</sub> solution (1 ml). <sup>1</sup>H NMR (400 MHz, CDCl<sub>3</sub>) δ: 8.17 (d, *J* = 7.8 Hz, 4H), 8.13 (s, 2H), 8.09 (d, *J* = 8.1 Hz, 2H), 7.88 (dd, *J* = 10.8, 9.2 Hz, 6H), 7.78 (d, *J* = 7.9 Hz, 4H), 7.66 (d, *J* = 8.4 Hz, 4H), 7.45 (dt, *J* = 14.8, 8.1 Hz, 14H), 7.31 (t, *J* = 7.3 Hz, 4H). <sup>13</sup>C NMR (100 MHz, CDCl<sub>3</sub>) δ: 147.88, 140.90, 140.04, 139.74, 137.25, 136.95, 135.68, 132.64, 132.31, 130.41, 129.83, 128.46, 128.34, 127.37, 126.00, 123.47, 121.92, 120.37, 120.02, 109.86. MS (MALDI-TOF): *m/z*: 816.4. Anal. calcd. for C<sub>60</sub>H<sub>40</sub>N<sub>2</sub>Si: C, 88.20; H, 4.93; N, 3.43; Si, 3.44. Found: C, 87.96; H, 4.99; N, 3.38; Si, 3.41.

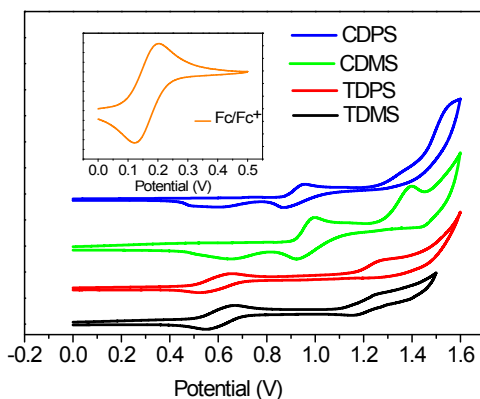

**Fig. S1** Cyclic voltammograms of oxidation waves of **TDMS**, **TPMS**, **CDMS**, and **CPMS**. The inset shows the oxidation curve of ferrocene.

**30 Table S1** Summary of EL device performance of silafluorene derivatives based on device B

| X               | Ratio (PVK:X) | V <sub>on</sub> <sup>a</sup> (V) | V <sub>20</sub> <sup>b</sup> (V) | η <sub>1,20</sub> <sup>c</sup> (cd/A) | η <sub>1,max</sub> <sup>d</sup> (cd/A) | η <sub>p,20</sub> <sup>e</sup> (lm/W) | η <sub>p,max</sub> <sup>f</sup> (lm/W) | L <sub>20</sub> <sup>g</sup> (cd/m <sup>2</sup> ) | L <sub>max</sub> <sup>h</sup> (cd/m <sup>2</sup> ) | EQE <sup>i</sup> (%) |
|-----------------|---------------|----------------------------------|----------------------------------|---------------------------------------|----------------------------------------|---------------------------------------|----------------------------------------|---------------------------------------------------|----------------------------------------------------|----------------------|
| <b>TDMS</b>     | 100:5         | 9.6                              | 12.0                             | 0.48                                  | 0.51                                   | 0.10                                  | 0.12                                   | 106                                               | 355                                                | 0.68                 |
|                 | 100:10        | 8.4                              | 12.0                             | 0.37                                  | 0.37                                   | 0.10                                  | 0.10                                   | 82                                                | 399                                                | 0.49                 |
|                 | 100:20        | 9.2                              | 12.8                             | 0.17                                  | 0.18                                   | 0.04                                  | 0.04                                   | 40                                                | 321                                                | 0.24                 |
| <b>TDPS</b>     | 100:5         | 9.0                              | 13.2                             | 0.62                                  | 0.62                                   | 0.15                                  | 0.16                                   | 125                                               | 302                                                | 0.63                 |
|                 | 100:10        | 7.2                              | 12.0                             | 0.93                                  | 0.96                                   | 0.24                                  | 0.30                                   | 193                                               | 1455                                               | 0.97                 |
|                 | 100:20        | 6.0                              | 10.0                             | 1.08                                  | 1.15                                   | 0.34                                  | 0.41                                   | 220                                               | 1323                                               | 1.16                 |
| <b>DPFL-NPB</b> | 100:5         | 11.0                             | 18.8                             | 1.49                                  | 1.54                                   | 0.25                                  | 0.25                                   | 299                                               | 1577                                               | 1.00                 |
|                 | 100:10        | 9.8                              | 18.4                             | 1.48                                  | 1.48                                   | 0.25                                  | 0.26                                   | 325                                               | 1021                                               | 0.97                 |
|                 | 100:20        | 7.9                              | 16.4                             | 1.69                                  | 1.69                                   | 0.32                                  | 0.36                                   | 375                                               | 1977                                               | 1.10                 |

<sup>a</sup>Turn on voltage when a brightness of 1 cd/m<sup>2</sup> observed. <sup>b</sup>Voltage taken at a current density of 20 mA/cm<sup>2</sup>. <sup>c</sup>Current efficiency at a current density of 20 mA/cm<sup>2</sup>. <sup>d</sup>Maximum current efficiency <sup>e</sup>Power efficiency at a current density of 20 mA/cm<sup>2</sup>. <sup>f</sup>Maximum power efficiency. <sup>g</sup>Luminance at a current density of 20 mA/cm<sup>2</sup>. <sup>h</sup>Maximum Luminance <sup>i</sup>External quantum efficiency at a current density of 20 mA/cm<sup>2</sup>.

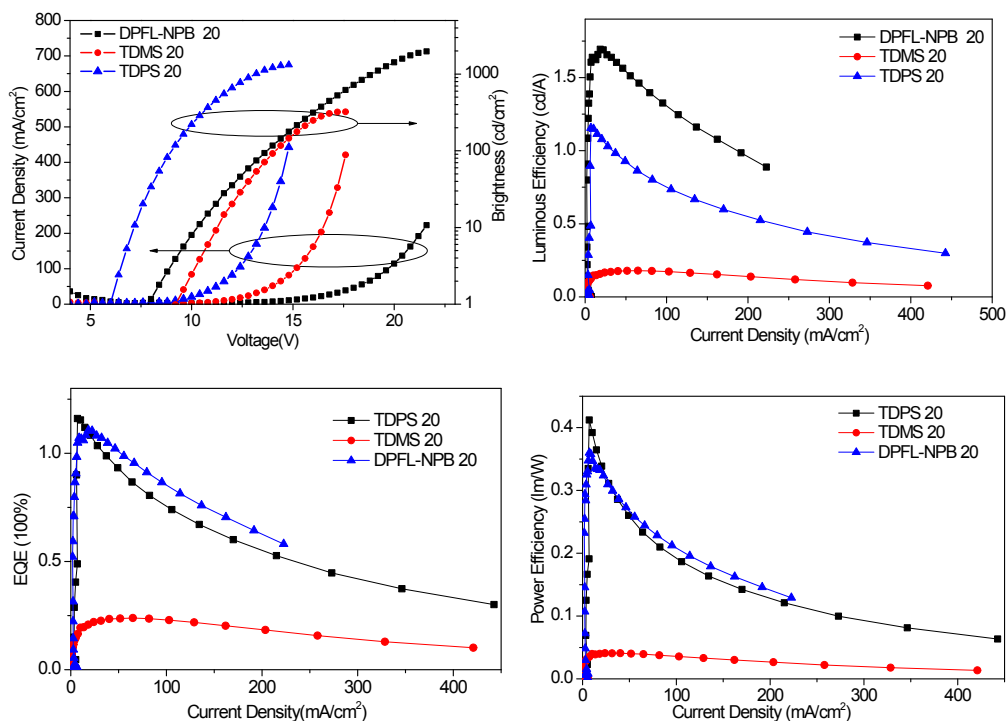

**Fig. S2** Current-voltage-brightness, luminance-current density, external quantum efficiency-current density, and power efficiency-current density curves of device B with **TDMS**, **TDPS**, and **DPFL-NPB**.

**5 Table S2** Summary of EL device performance of silafluorene derivatives based on device D

| Device          | $V_{on}^a$<br>(V) | $V_{20}^b$<br>(V) | $\eta_{l,20}^c$<br>(cd/A) | $\eta_{l,max}^d$<br>(cd/A) | $\eta_{p,20}^e$<br>(lm/W) | $\eta_{p,max}^f$<br>(lm/W) | $L_{20}^g$<br>(cd/m <sup>2</sup> ) | $L_{max}^h$<br>(cd/m <sup>2</sup> ) | EQE<br>(%) | $\lambda_{EL}$ (fwhm) <sup>i</sup><br>(nm) |
|-----------------|-------------------|-------------------|---------------------------|----------------------------|---------------------------|----------------------------|------------------------------------|-------------------------------------|------------|--------------------------------------------|
| <b>TDMS</b>     | 5.6               | 10.8              | 2.35                      | 2.53                       | 0.68                      | 0.69                       | 485                                | 3494                                | 2.18       | 449(81)                                    |
| <b>TDPS</b>     | 4.4               | 9.6               | 2.78                      | 2.81                       | 0.91                      | 0.91                       | 572                                | 5501                                | 2.48       | 440(70)                                    |
| <b>DPFL-NPB</b> | 5.6               | 10.4              | 1.07                      | 1.13                       | 0.34                      | 0.34                       | 255                                | 3502                                | 0.66       | 472(100)                                   |

<sup>a</sup>Turn on voltage when a brightness of 1 cd/m<sup>2</sup> observed. <sup>b</sup>Voltage taken at a current density of 20 mA/cm<sup>2</sup>. <sup>c</sup>Current efficiency at a current density of 20 mA/cm<sup>2</sup>. <sup>d</sup>Maximum current efficiency <sup>e</sup>Power efficiency at a current density of 20 mA/cm<sup>2</sup>. <sup>f</sup>Maximum power efficiency. <sup>g</sup>Luminance at a current density of 20 mA/cm<sup>2</sup>. <sup>h</sup>Maximum Luminance <sup>i</sup>External quantum efficiency at a current density of 20 mA/cm<sup>2</sup>.

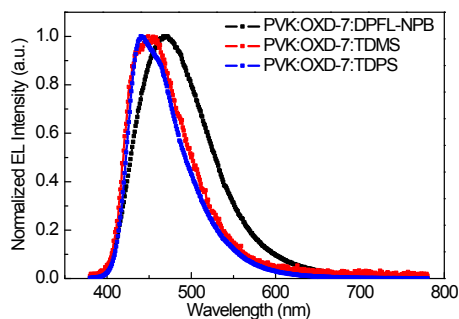

**Fig. S3** EL spectra of device D with **TDMS**, **TDPS**, or **DPFL-NPB** as dopants.

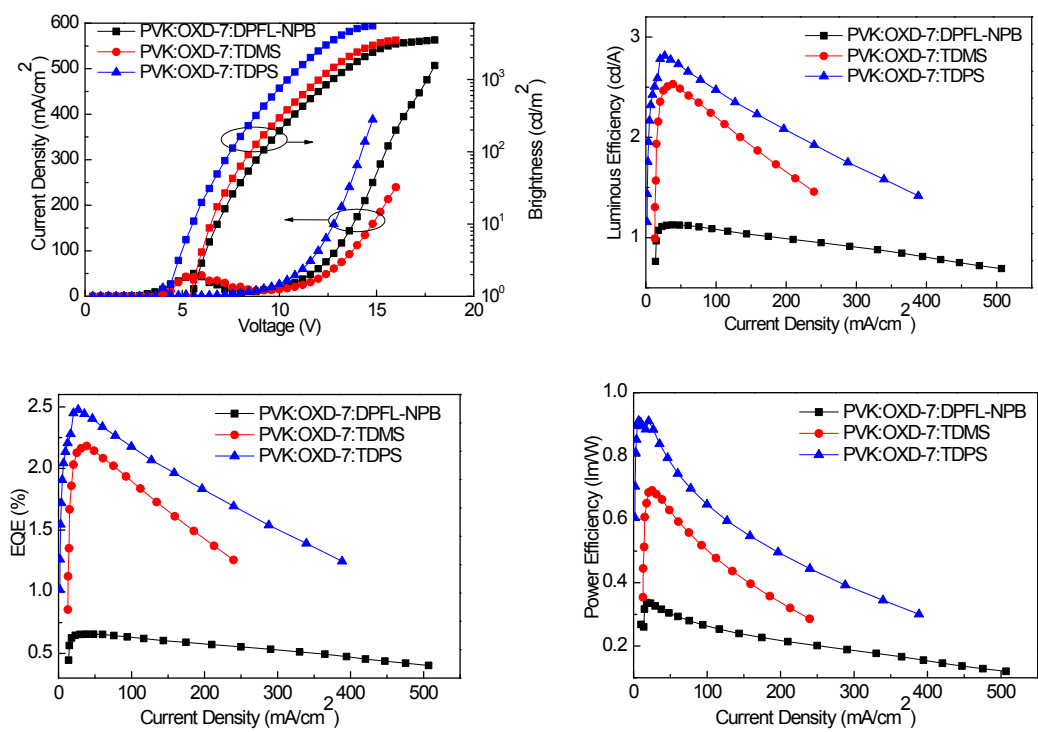

**Fig. S4** Current-voltage-brightness, luminance-current density, external quantum efficiency-current density, and power efficiency-current density curves of device D with TDMS, TDPS, and DPFL-NPB.
